# Supplementary material for: Circular bioprocess for phosphorus nutrient recovery to grow lettuce in lunar space
Source: Royal Society of Chemistry journal article supplement (doi:10.1039/d2gc04264a), 2023-01-01
Supplement: d2gc04264a1.pdf [file d2gc04264a1.pdf]

# Circular Bioprocess for Phosphorus Nutrient Recovery to Grow Lettuce in Lunar Space

Volker Hessel <sup>\*#a</sup>, Marc Escribà-Gelonch <sup>#b</sup>, Mruddual Kirankumar Sojitra<sup>a</sup>, Raihanah Pranggono <sup>c</sup>, Daniel Kinasz <sup>a</sup>, Changping Zhuang <sup>a</sup>, Kenneth Davey <sup>a</sup>, Michael McLaughlin<sup>d</sup>, Nam Nghiep Tran <sup>a,e</sup>

<sup>a</sup> The University of Adelaide, School of Chemical Engineering, Adelaide 5005, Australia.

<sup>b</sup> University of Lleida, Higher Polytechnic Engineering School, Igualada, Spain.

<sup>d</sup> The University of Adelaide, School of Agriculture, Food and Wine, Adelaide 5005, Australia.

<sup>c</sup> University of Melbourne, Faculty of Medicine, Dentistry and Health Sciences, Melbourne, Australia.

<sup>e</sup> Can Tho University, Department of Chemical Engineering, Can Tho 910000, Vietnam

*# First author, \* Author for correspondence*

## Supporting Information

### Index of contents

- S1. Phosphorus content of plants
- S2. Statistical assessment of phosphorous extraction
- S3. Statistical assessment of potassium extraction
- S4. Combining P-K extraction from lettuce roots

## **S1. Phosphorus content of plants**

*Table 1: Phosphorus content of different parts and varieties of plants.*

| <b>Vegetable</b> | <b>Parts/Varieties</b>                | <b>Amount of P (mg/100g)</b> | <b>Source</b> |
|------------------|---------------------------------------|------------------------------|---------------|
| Amaranth         | Grain                                 | 557                          | [1]           |
|                  | Leaves                                | 50                           | [2]           |
| Cabbage          | Chinese (pak-choi)                    | 37                           | [3]           |
|                  | Chinese (pe-tsai)                     | 29                           |               |
|                  | Common (danish, domestic and pointed) | 23                           |               |
|                  | Red                                   | 30                           |               |
|                  | Regular                               | 26                           |               |
|                  | Savoy                                 | 42                           |               |
|                  | Swamp (skunk)                         | 39                           |               |
| Common bean      | N/A                                   | 450-720 (of dry matter)      | [4]           |
|                  |                                       | 483.5 (of dry matter)        | [5]           |
| Corn             | Sweet white and yellow                | 89                           | [6]           |
|                  | White and yellow                      | 210                          |               |
| Lentils          | Pink/red                              | 450                          | [7]           |
|                  |                                       | 294                          | [8]           |
|                  | Regular                               | 281                          | [9]           |
|                  |                                       | 451                          | [8b]          |
| Sprouted         | 173                                   | [10]                         |               |
| Pumpkin/squash   | 'Flesh'                               | 44                           | [11]          |
|                  | Flowers                               | 49                           | [12, 11c]     |
|                  | Leaves                                | 104                          | [13, 11c]     |
|                  | Seed kernels, dried                   | 1233                         | [14]          |
| Rice             | Brown, long-grain                     | 333                          | [15]          |
|                  | Brown, medium-grain                   | 264                          | [15a, 16]     |
|                  | Glutinous                             | 71                           | [17]          |
|                  | Long-grain, white                     | 115                          | [18]          |
|                  | Medium-grain, white                   | 108                          | [17a, 19]     |
|                  | Short-grain, white                    | 95                           | [17a, 20]     |
| Soybean          | Green                                 | 194                          | [21]          |
|                  | Mature seeds                          | 704                          |               |
|                  | Mature seeds, sprouted                | 164                          |               |

## **S2. Statistical assessment of phosphorus extraction**

In order to set the optimal working conditions, the effect of the extraction agent, extraction time and roots calcination temperature was studied using analysis of variance. For this purpose, a sequential sum of squares for two-factor interaction design (2FI) was performed using the Design-Expert software (Version-13.0.1.0). Significances were evaluated at 95 % confidence level.

Table 2 shows the ANOVA assessment carried out using results obtained at 4 levels of extraction times (1, 2, 3 and 4 hours), 3 calcination temperatures (250, 450 and 750 °C) as well as 3 extraction solvents (sulphuric acid 0.05 M, citric acid 0.1 M and oxalic acid 0.1 M). The model obtained resulted to be significant at 95 % confidence level with an  $R^2$  of 0.81. Figure 1 shows the residuals normal plot (a) as well as the predicted vs experimental plot (b) in order to show the accuracy of the model.

Best results were obtained for oxalic 0.1 M and citric acid 0.1 M with, respectively, 117 and 96 mg P L<sup>-1</sup>, whilst sulphuric acid of 0.05 M yielded a 67 mg P L<sup>-1</sup> solution, with a 250 °C calcination temperature and 4 h extraction.

*Table 2: ANOVA factorial assessment of the effect of calcination temperature, extraction time and solvent on dissolved P measurements (\* refers to significant values at 95 % confidence level, Df: degree of freedom)*

| <b>Source</b>   | <b>Sum of Squares</b> | <b>Df</b> | <b>Mean Square</b> | <b>F-value</b> | <b>p-value</b> |
|-----------------|-----------------------|-----------|--------------------|----------------|----------------|
| <b>Model</b>    | 0.0232                | 15        | 0.0015             | 5.92           | 0.0001 *       |
| A-Time          | 0.0016                | 1         | 0.0016             | 5.96           | 0.0236 *       |
| B-Temp.         | 0.0012                | 1         | 0.0012             | 4.69           | 0.0419 *       |
| C-Solvent       | 0.0172                | 3         | 0.0057             | 21.89          | < 0.0001 *     |
| AB              | 0.0003                | 1         | 0.0003             | 0.9920         | 0.3306         |
| AC              | 0.0001                | 2         | 0.0001             | 0.2486         | 0.7822         |
| BC              | 0.0015                | 3         | 0.0005             | 1.96           | 0.1503         |
| A <sup>2</sup>  | 3.683E-06             | 1         | 3.683E-06          | 0.0141         | 0.9066         |
| B <sup>2</sup>  | 0.0018                | 1         | 0.0018             | 6.92           | 0.0156 *       |
| ABC             | 0.0004                | 2         | 0.0002             | 0.7903         | 0.4668         |
| <b>Residual</b> | 0.0055                | 21        | 0.0003             |                |                |
| <b>Total</b>    | 0.0287                | 36        |                    |                |                |

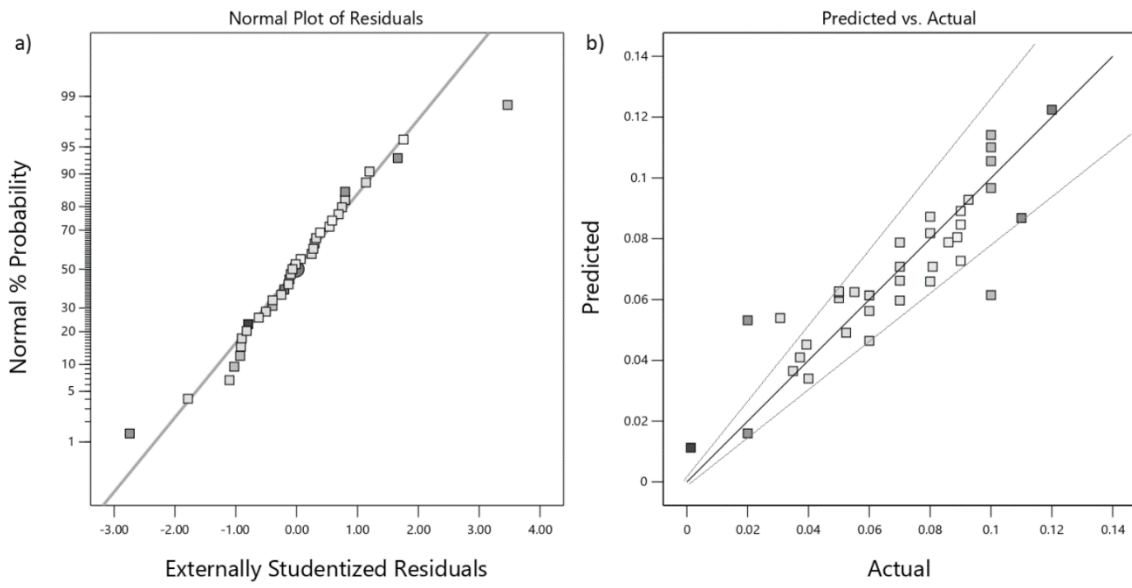

Figure 1: a) *P* residuals normal plot of experiments, b) predicted vs experimental results for *P* extraction with 20 % deviation lines.

### **S3. Statistical assessment of potassium extraction**

The effect of the extraction agent, extraction time and roots calcination temperature were studied using two-factor interaction design (2FI) analysis of variance at 95% confidence level. Table 3 shows the ANOVA assessment for K content carried out using results obtained at 4 levels of extraction times (1, 2, 3 and 4 hours), 3 calcination temperatures (250, 450 and 750 °C) as well as 3 extraction solvents (sulphuric acid 0.05 M, citric acid 0.1 M and oxalic acid 0.1 M). The model obtained resulted to be significant at 95 % confidence level with an  $R^2$  of 0.80. Figure 2 shows the normal (a) and experimental vs predicted (b) plots, which confirm the good correlation of the model with good prediction capacity.

The optimal conditions for K extraction were achieved when calcining lettuce roots at 250 °C and 0.5 h with 0.1 M citric acid as extracting acid. The optimal K extraction yield is 1083 mg K mL<sup>-1</sup>.

*Table 3: ANOVA factorial assessment of the effect of calcination temperature, extraction time and solvent on dissolved K measurements (\* refers to significant values at 95 % confidence level. Df: Degree of freedom)*

| <b>Source</b>   | <b>Sum of Squares</b> | <b>df</b> | <b>Mean Square</b> | <b>F-value</b> | <b>p-value</b> |
|-----------------|-----------------------|-----------|--------------------|----------------|----------------|
| <b>Model</b>    | 1.74                  | 15        | 0.1161             | 5.44           | 0.0002 *       |
| A-Time          | 0.0277                | 1         | 0.0277             | 1.30           | 0.2674         |
| B-Temp.         | 0.5630                | 1         | 0.5630             | 26.36          | < 0.0001 *     |
| C-Solvent       | 0.2566                | 3         | 0.0855             | 4.00           | 0.0212 *       |
| AB              | 0.0422                | 1         | 0.0422             | 1.97           | 0.1745         |
| AC              | 0.0756                | 2         | 0.0378             | 1.77           | 0.1949         |
| BC              | 0.1017                | 3         | 0.0339             | 1.59           | 0.2225         |
| A <sup>2</sup>  | 0.0000                | 1         | 0.0000             | 0.0014         | 0.9701         |
| B <sup>2</sup>  | 0.3919                | 1         | 0.3919             | 18.34          | 0.0003 *       |
| ABC             | 0.1034                | 2         | 0.0517             | 2.42           | 0.1133         |
| <b>Residual</b> | 0.4486                | 21        | 0.0214             |                |                |
| <b>Total</b>    | 2.19                  | 36        |                    |                |                |

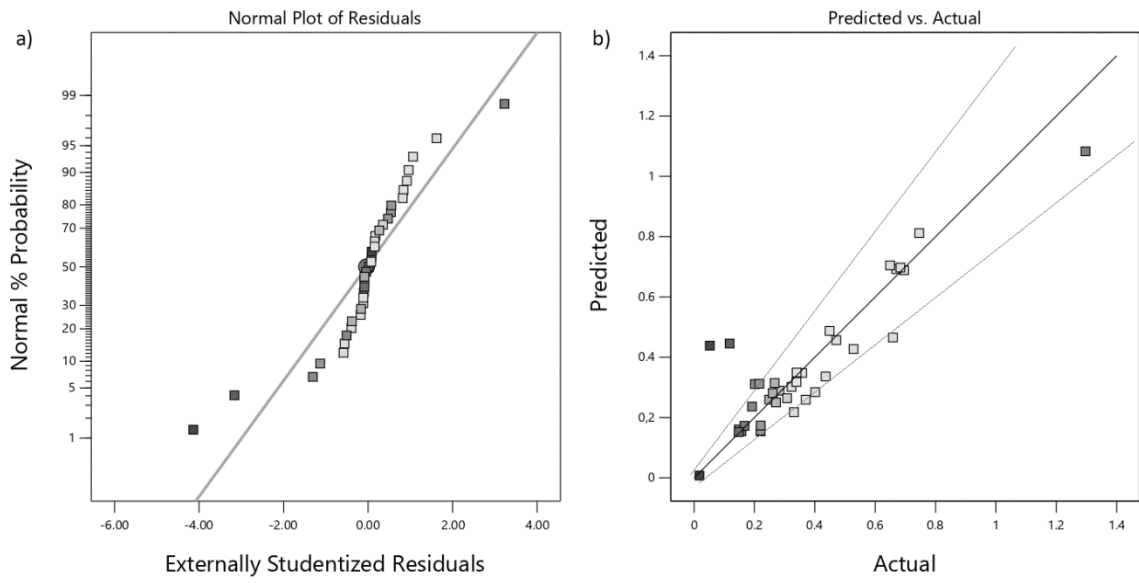

Figure 2: a) *P* residuals normal plot of experiments, b) predicted vs experimental results for *K* extraction with 20 % deviation lines.

#### **S4. Combining P-K extraction from lettuce roots**

From one side, optimal P extraction is achieved using oxalic acid 0.1 M during 4 hours using ashes calcinated at 250 °C, giving a maximum concentration of 117 mg P L<sup>-1</sup>. From the other side, the optimal K extraction is achieved with citric acid 0.1 M during 0.5 h using also ashes calcinated at 250 °C. The optimal K extraction yield is 1083 mg K mL<sup>-1</sup>. Based on the hypothesis of maximum simultaneous extraction, a new variable was created: P+K, meaning the sum of both nutrients in the extracted solution in the same operating conditions based on previous experiments. The scenarios under study are shown in Table 4. As a result, optimal extraction conditions of 250 °C calcination temperature using 30 min extraction time were confirmed using oxalic acid 0.1 M. In these conditions, the prediction pattern estimates a simultaneous extraction of max. 92 mg P L<sup>-1</sup> and 688 mg K L<sup>-1</sup> in just one run, which means 77 % P and 64 % K of the single maximum extraction capacities.

*Table 4: Statistical optimization of simultaneous P and K extractions from lettuce root ash. Results are sorted according to the value of P+K variable.*

| <b>Item</b> | <b>Time, h</b> | <b>T, °C</b> | <b>Acid</b>   | <b>P, g L<sup>-1</sup></b> | <b>K, g L<sup>-1</sup></b> | <b>P+K, g L<sup>-1</sup></b> |
|-------------|----------------|--------------|---------------|----------------------------|----------------------------|------------------------------|
| <b>1</b>    | <b>0.5</b>     | <b>250.0</b> | <b>Oxalic</b> | <b>0.092</b>               | <b>0.688</b>               | <b>0.733</b>                 |
| 2           | 0.7            | 250.0        | Oxalic        | 0.094                      | 0.688                      | 0.726                        |
| 3           | 0.5            | 260.3        | Oxalic        | 0.091                      | 0.659                      | 0.726                        |
| 4           | 1.1            | 250.0        | Oxalic        | 0.097                      | 0.689                      | 0.712                        |
| 5           | 0.5            | 250.0        | Citric        | 0.073                      | 1.083                      | 0.690                        |
| 6           | 0.5            | 253.8        | Citric        | 0.072                      | 1.069                      | 0.688                        |
| 7           | 0.5            | 257.7        | Citric        | 0.071                      | 1.054                      | 0.685                        |
| 8           | 0.5            | 260.3        | Citric        | 0.071                      | 1.045                      | 0.683                        |
| 9           | 0.5            | 262.3        | Citric        | 0.071                      | 1.037                      | 0.682                        |
| 10          | 0.9            | 250.0        | Citric        | 0.077                      | 1.012                      | 0.676                        |
| 11          | 1.2            | 250.0        | Citric        | 0.080                      | 0.957                      | 0.665                        |
| 12          | 0.5            | 250.0        | Sulphuric     | 0.043                      | 0.419                      | 0.547                        |
| 13          | 0.5            | 253.9        | Sulphuric     | 0.043                      | 0.411                      | 0.544                        |
| 14          | 0.5            | 265.0        | Sulphuric     | 0.042                      | 0.389                      | 0.537                        |
| 15          | 0.9            | 250.0        | Sulphuric     | 0.046                      | 0.427                      | 0.529                        |
| 16          | 0.5            | 250.0        | None          | 0.004                      | 0.469                      | 0.443                        |
| 17          | 0.5            | 250.0        | None          | 0.004                      | 0.466                      | 0.441                        |
| 18          | 0.5            | 260.3        | None          | 0.003                      | 0.442                      | 0.436                        |
| 19          | 0.9            | 250.0        | None          | 0.008                      | 0.444                      | 0.426                        |

## Reference list

- <sup>1</sup> Amaranth, uncooked Nutrition Facts & Calories. USDA. Subset, Food, and All Foods. National Nutrient Database for Standard Reference, Amaranth grain. Release 28; 2016. At:  
[https://www.nutritionvalue.org/Amaranth\\_grain%2C\\_uncooked\\_nutritional\\_value.html?size=100+g](https://www.nutritionvalue.org/Amaranth_grain%2C_uncooked_nutritional_value.html?size=100+g) (Accessed Jan 2022).
- <sup>2</sup> [https://www.nutritionvalue.org/Amaranth\\_leaves%2C\\_raw\\_nutritional\\_value.html?size=100+g](https://www.nutritionvalue.org/Amaranth_leaves%2C_raw_nutritional_value.html?size=100+g) (Accessed Aug 2022)
- <sup>3</sup> a) Diet and Fitness Today. At: <http://www.dietandfitnesstoday.com/phosphorus-in-cabbage.php> (Accessed Aug 2022)  
b) U.S. Department of Agriculture. At: <https://fdc.nal.usda.gov/fdc-app.html#/food-details/169975/nutrients> (Accessed Aug 2022)  
c) Nutrition Data. At: <https://nutritiondata.self.com/facts/vegetables-and-vegetable-products/2371/2> (Accessed Aug 2022)
- <sup>4</sup> M. de Barros and S. Prudencio. Physical and chemical characteristics of common bean varieties. *Cienc. Agrar.* 2016, 37(2), 751. DOI: 10.5433/1679-0359.2016v37n2p751.
- <sup>5</sup> R. Baptista Mambrin, D. Sausen, D. Moura, I. Ricardo Carvalho, V. Jardel Szareski and G. Gelain Conte. Phosphorus partition, phytic acid concentration and grains productivity of beans cultivars as a response to phosphate nutrition. *Commun. Plant Sci.* 2021, 11, 046-056. DOI: 10.26814/cps2021006
- <sup>6</sup> Diet and Fitness Today. At: <http://www.dietandfitnesstoday.com/phosphorus-in-corn.php> (Accessed Aug 2022)
- <sup>7</sup> Pacific Seeds. At: <https://www.pacificseeds.com.au/wp-content/uploads/2019/10/Corn-nutrition-guide.pdf> (Accessed Aug 2022)
- <sup>8</sup> a) U.S. Department of Agriculture. At: <https://fdc.nal.usda.gov/fdc-app.html#/food-details/174284/nutrients>. (Accessed Aug 2022)  
b) Diet & Fitness today. At: <http://www.dietandfitnesstoday.com/phosphorus-in-lentils.php> (Accessed Aug 2022)
- <sup>9</sup> a) U.S. Department of Agriculture. At: <https://fdc.nal.usda.gov/fdc-app.html#/food-details/172420/nutrients>. (Accessed Aug 2022)  
b) Eat this much. At: <https://www.eatthismuch.com/food/nutrition/lentils,3566/> (Accessed Aug 2022)
- <sup>10</sup> a) U.S. Department of Agriculture. At: <https://fdc.nal.usda.gov/fdc-app.html#/food-details/168427/nutrients> (Accessed Aug 2022)  
b) Nutrition Data. At: <https://nutritiondata.self.com/facts/legumes-and-legume-products/4337/2> (Accessed Aug 2022)
- <sup>11</sup> a) U.S. Department of Agriculture. At: <https://fdc.nal.usda.gov/fdc-app.html#/food-details/168448/nutrients> (Accessed Aug 2022)  
b) Eat This much. At <https://www.eatthismuch.com/food/nutrition/pumpkin,2144/> (Accessed Aug 2022)  
c) Diet & Fitness today. At: <http://www.dietandfitnesstoday.com/phosphorus-in-pumpkin.php>. (Accessed Aug 2022)
- <sup>12</sup> a) U.S. Department of Agriculture. At: <https://fdc.nal.usda.gov/fdc-app.html#/food-details/169270/nutrients> (Accessed Aug 2022)



- b) Eat this much. At: <https://www.eatthismuch.com/food/nutrition/pumpkin-flowers,2140/> (*Accessed Aug 2022*)
- <sup>13</sup> a) U.S. Department of Agriculture. At: <https://fdc.nal.usda.gov/fdc-app.html#/food-details/169272/nutrients> (*Accessed Aug 2022*)  
b) Eat this much. At: <https://www.eatthismuch.com/food/nutrition/pumpkin-leaves,2142/> (*Accessed Aug 2022*)
- <sup>14</sup> a) Diet & Fitness today. At: <http://www.dietandfitnesstoday.com/phosphorus-in-pumpkin-seeds.php> (*Accessed Aug 2022*)  
b) Seeds, pumpkin plus squash seed kernels, dried. At: <https://www.traditionaloven.com/foods/details/nuts-seeds/seeds-pumpkin-squash-seed-kernels-dried.html> (*Accessed Aug 2022*)
- <sup>15</sup> a) Diet & Fitness today. At: <http://www.dietandfitnesstoday.com/phosphorus-in-rice.php> (*Accessed Aug 2022*)  
b) Nutrition Data. At: <https://nutritiondata.self.com/facts/cereal-grains-and-pasta/5706/2> (*Accessed Aug 2022*)
- <sup>16</sup> Nutrition Data. At: <https://nutritiondata.self.com/facts/cereal-grains-and-pasta/5709/2> (*Accessed Aug 2022*)
- <sup>17</sup> a) Diet & Fitness today. At: <http://www.dietandfitnesstoday.com/phosphorus-in-white-rice.php> (*Accessed Aug 2022*)  
b) Nutrition Data. At: <https://nutritiondata.self.com/facts/cereal-grains-and-pasta/5721/2> (*Accessed Aug 2022*)
- <sup>18</sup> Nutrition Data. At: <https://nutritiondata.self.com/facts/cereal-grains-and-pasta/5812/2> (*Accessed Aug 2022*)
- <sup>19</sup> Nutrition Data. At: <https://nutritiondata.self.com/facts/cereal-grains-and-pasta/5816/2> (*Accessed Aug 2022*)
- <sup>20</sup> Nutrition Data. At: <https://nutritiondata.self.com/facts/cereal-grains-and-pasta/5818/2> (*Accessed Aug 2022*)
- <sup>21</sup> Diet & Fitness today. At: <http://www.dietandfitnesstoday.com/phosphorus-in-soybeans.php> (*Accessed Aug 2022*)
